# Supplementary material for: Cesarean Section and Its Correlates Among Early Child Bearing Women in Nepal
Source: Research Square preprint supplement (doi:10.21203/rs.3.rs-322307/v1), 2021-03-18
Supplement: Supplementary file 1 [file f00e37833cfdec893ad47448.docx]

**Figure 1:** Rate of CS among early child bearing women (18 years) across various wealth quintiles. Data are the rate of CS among early child bearing women across five wealth quintiles (poorest t richest) where X-axis represents wealth quintiles and Y-axis represents the rate of CS in percentage. The graph depicts the increasing rate of CS among women of early child bearing. *P-value* was obtained from bivariable analysis.
